1 Human papillomavirus 16 E2 repression of TWIST1 transcription  
2 is a potential mediator of HPV16 cancer outcomes

3 Christian T Fontan<sup>1</sup>, Dipon Das<sup>1</sup>, Molly L Bristol<sup>1</sup>, Claire D James<sup>1</sup>, Xu  
4 Wang<sup>1</sup>, Hannah Lohner<sup>1</sup>, Azeddine Atfi<sup>2,3</sup> and Iain M. Morgan<sup>1,3\*</sup>

<sup>1</sup>Virginia Commonwealth University (VCU), Philips Institute for Oral Health Research,  
School of Dentistry, Richmond, VA, 23298

<sup>2</sup>Department of Pathology, VCU School of Medicine, Richmond VA 23298

5 <sup>3</sup>VCU Massey Cancer Center, Richmond, VA, 23298

\* Corresponding author. Email [immorgan@vcu.edu](mailto:immorgan@vcu.edu). Telephone 804 828 0149

Keywords: human papillomavirus, E2, TWIST1, cervical cancer, head and neck cancer,  
epithelial to mesenchymal transition, EMT, repression

**Running title: HPV16 E2 repression of TWIST1**

6

## 7 **Abstract**

8 Human papillomaviruses are causative agents in around 5% of all cancers, including cervical  
9 and oropharyngeal. A feature of HPV cancers is their better clinical outcome compared with  
10 non-HPV anatomical counterparts. In turn, the presence of E2 predicts a better clinical outcome  
11 in HPV positive cancers; the reason(s) for the better outcome of E2 positive patients is not fully  
12 understood. Previously, we demonstrated that HPV16 E2 regulates host gene transcription that  
13 is relevant to the HPV16 life cycle in N/Tert-1 cells. One of the genes repressed by E2 and the  
14 entire HPV16 genome in N/Tert-1 cells is TWIST1. Here we demonstrate that TWIST1 RNA  
15 levels are reduced in HPV positive versus negative head and neck cancer, and that E2 and  
16 HPV16 downregulate both TWIST1 RNA and protein in our N/Tert-1 model; E6/E7 cannot  
17 repress TWIST1. E2 represses the TWIST1 promoter in transient assays, and is localized to the  
18 TWIST1 promoter; E2 also induces repressive epigenetic changes on the TWIST1 promoter.  
19 TWIST1 is a master transcriptional regulator of the epithelial to mesenchymal transition (EMT)  
20 and a high level of TWIST1 is a prognostic marker indicative of poor cancer outcomes. We  
21 demonstrate that TWIST1 target genes are also downregulated in E2 positive N/Tert-1 cells,  
22 and that E2 promotes a failure in wound healing, a phenotype of low TWIST1 levels. We  
23 propose that the presence of E2 in HPV positive tumors leads to TWIST1 repression, and that  
24 this plays a role in the better clinical response of E2 positive HPV tumors.

## 25 **Importance**

26 HPV16 positive cancers have a better clinical outcome than their non-HPV anatomical  
27 counterparts. Furthermore, the presence of HPV16 E2 RNA predicts a better outcome for  
28 HPV16 positive tumors; the reasons for this are not known. Here we demonstrate that E2  
29 represses expression of the TWIST1 gene; an elevated level of this gene is a marker of poor  
30 prognosis for a variety of cancers. We demonstrate that E2 directly binds to the TWIST1  
31 promoter and actively represses transcription. TWIST1 is a master regulator promoting EMT

32 and here we demonstrate that the presence of E2 reduces the ability of N/Tert-1 cells to wound  
33 heal. Overall, we propose that the E2 repression of TWIST1 may contribute to the better clinical  
34 outcome of E2 positive HPV16 positive tumors.

35

## 36 **Introduction**

37 HPV are causative agents in around 5% of all human cancers (1). HPV16 is the most prevalent  
38 high-risk (those that cause cancer) type of HPV, responsible for around 50% of cervical cancers  
39 and 90% of HPV positive oropharyngeal cancers (HPV16+OPC). The latter has reached  
40 epidemic proportion in the past generation (2-5). The HPV genome is circular and around 8kbp  
41 in size.

42 HPV infect basal epithelial cells and upon nuclear entry a host of cellular factors activate  
43 transcription from the viral long control region (LCR) (6). The resultant viral transcript is  
44 processed into individual gene RNAs that are then translated. The viral oncoproteins E6 and E7  
45 target several cellular proteins and disrupt their functions, including the tumor suppressors p53  
46 and pRb, respectively (7, 8). Both p53 and pRb are transcription factors, therefore the presence  
47 of E6 and E7 in cells results in a disruption of host gene transcription that contributes to the  
48 oncogenic properties of HPV. HPV use two proteins to regulate replication of the viral genome.  
49 The E2 protein forms homodimers via a carboxyl terminal domain and binds to four 12bp  
50 palindromic sequences within the viral LCR. Three of these surround the viral origin of  
51 replication (9) and via the amino terminus of the E2 protein, the viral helicase E1 is recruited to  
52 the A/T rich viral origin of replication (10). E1 forms a di-hexameric helicase that then replicates  
53 the viral genome in association with host polymerases (11-14). Following infection, the virus  
54 replicates to around 50 copies per cell to establish the infection. This copy number is maintained  
55 as the infected cell migrates through the epithelium before amplifying in the upper layers; the  
56 L1/L2 structural proteins are then expressed and the viral genomes encapsulated resulting in  
57 viral particles that egress from the upper layers of the epithelium (15).

58 As well as acting as a replication factor, the E2 protein can regulate transcription. Where E2  
59 sites are present upstream from a heterologous promoter such as herpes simplex virus 1  
60 thymidine kinase (tk) promoter, E2 can activate transcription (16, 17). In addition,

61 overexpression of E2 can repress transcription from the viral LCR (18-20). Given the ability of  
62 E2 to act as a transcription factor, the ability of E2 to regulate host gene transcription has been  
63 studied. E2 can regulate transcription via AP1 (21-25), nuclear receptors (26), and C/EBP (27).  
64 Transient E2 overexpression identified global gene changes induced by E2 (28-30). To gain a  
65 greater understanding of E2 regulation of host gene transcription by physiologically tolerated  
66 levels of E2, we generated stable cell lines expressing E2 and identified E2 induced host gene  
67 expression changes. This was originally done in U2OS cells (31, 32). However, we wished to  
68 develop a more physiologically relevant model and to do this we used N/Tert-1 cells, foreskin  
69 keratinocytes immortalized by telomerase. We generated N/Tert-1 cell lines stably expressing  
70 HPV16 E2. For comparison, we also prepared N/Tert-1 cells that contained the entire HPV16  
71 genome, and have previously demonstrated that N/Tert-1 cells support late stages of the  
72 HPV16 life cycle making it an appropriate model for the study of HPV16 (33). RNA-seq analysis  
73 demonstrated a significant overlap between genes regulated by E2 and those regulated by the  
74 entire HPV16 genome (34). Many innate immune genes were repressed by HPV16 E2 and the  
75 entire genome, and these genes are also repressed by E6 and E7 expression. We recently  
76 demonstrated that one of these genes, SAMHD1, is a restriction factor for HPV16 as it controls  
77 the viral life cycle in the differentiating epithelium (35). However, we wished to identify a gene  
78 that was only regulated by E2, not by E6/E7. Our RNA-seq analysis predicted that TWIST1 was  
79 transcriptionally repressed by E2 and the entire HPV16 genome in N/Tert-1 cells; in addition,  
80 TWIST1 was also downregulated in HPV16 positive versus negative head and neck cancer  
81 (34).

82 TWIST1 is a basic helix-loop-helix transcription factor critical for promoting epithelial to  
83 mesenchymal transition (EMT) and embryogenesis (36, 37). EMT is a critical process in cancer  
84 as this trait is associated with high grade malignancy and resistance to chemotherapeutic

85 agents (38-41). EMT is an epigenetic process that proceeds independently from DNA mutations  
86 (42). In addition, EMT promotes immune escape of cancer cells (43).

87 The potential repression of TWIST1 expression by HPV16 E2 is intriguing as it could play a role  
88 in dictating therapeutic outcomes. Several reports have demonstrated that the expression of E2  
89 in HPV16 positive tumors predicts improved survival and repression of TWIST1 would correlate  
90 with this improved survival (44-46). Here we demonstrate that TWIST1 is transcriptionally  
91 repressed by E2 in N/Tert-1 cells, and that TWIST1 is downregulated in HPV positive head and  
92 neck cancer versus HPV negative. The mechanism of E2 repression is not due to DNA  
93 methylation, but involves direct binding of E2 to the TWIST1 promoter, repressing transcription  
94 and inducing repressive histone markers. We demonstrate that TWIST1 target genes are also  
95 downregulated in E2 expressing cells, and that wound healing is compromised. As EMT is a  
96 process that occurs during wound healing, the observed change in wound healing suggests that  
97 E2 contributes to EMT suppression in N/Tert-1 cells (47). Two HPV16 positive head and neck  
98 cancer cell lines were also studied, one that has episomal viral genomes and therefore  
99 expresses E2, and the other with an integrated HPV16 genome that has lost E2 expression. In  
100 the episomal genome containing cell line, the presence of E2 resulted in decreased levels of  
101 TWIST1 when compared with the integrated non-E2 expressing cell line. Finally, neither E6 nor  
102 E7 is able to regulate the expression of TWIST1. Overall, our results support the idea that E2  
103 represses TWIST1 expression during the HPV16 life cycle, and that this downregulation persists  
104 into HPV16 positive tumors. TWIST1 repression would promote a better patient outcome, a  
105 hallmark of E2 expression (44-46).

106

107 **Results**

108 **TWIST1 is transcriptionally repressed by E2, but not E6/E7.**

109 Our RNA-seq analysis of N/Tert-1+E2 (expressing HPV16 E2 only) and N/Tert-1+HPV16  
110 (containing the entire HPV16 genome) demonstrated that there was a highly statistically  
111 significant overlap between the genes regulated by E2 and the entire HPV16 genome (34). In  
112 addition, using our analysis of TCGA data, we observed a significant downregulation of TWIST1  
113 in HPV16 positive versus negative head and neck cancers (HNSCCs) (33, 34). Figure 1A  
114 summarizes the expression of TWIST1 in both episomal and integrated HPV16 positive versus  
115 HPV16 negative HNSCCs. Because integration disrupts E2 gene expression, integration and  
116 episomal groups were determined depending on their E2 expression (46, 48). TWIST1 mRNA  
117 expression data were obtained from 528 TCGA tumors using cBio Cancer Genomic Portal (49,  
118 50). We have previously characterized HPV16 status and viral integration in these samples (46).  
119 TWIST1 mRNA expression was then compiled and reported by HPV16 status (Figure 1A). We  
120 found that TWIST1 mRNA is expressed at statistically significantly lower levels in episomal  
121 HPV16 positive tumors compared to those that were either integrated or HPV16 negative. There  
122 was no statistical difference in TWIST1 expression between integrated and HPV-negative  
123 tumors. Figure 1B summarizes our previous data from our RNA-seq analysis in N/Tert-1 cells.  
124 TWIST1 was found to be significantly downregulated in N/Tert1 cells expressing HPV16 E2 or  
125 the entire viral episome, compared to parental control cells (33, 34).

126 Figure 2A validates the downregulation of TWIST1 RNA expression in N/Tert-1 cells expressing  
127 E2 or the entire HPV16 genome (compare lane 2 and 3, respectively, with lane 1). We have  
128 also previously reported the overexpression of HPV16 E6 and E7 in the same cell background,  
129 and these oncogenes did not alter the expression of TWIST1 (lane 4). This is in contrast with  
130 our prior study of innate immune response gene regulation by HPV16 which demonstrated that  
131 E2, E6 and E7 can all repress these genes (34). Therefore, TWIST1 is the first gene we have

132 determined to be likely exclusively regulated by E2 during the HPV16 life cycle. To confirm that  
133 the RNA expression was reflected at the functional protein level, western blots were carried out  
134 for TWIST1 (Figure 2B). There is a clear downregulation of TWIST1 protein expression in cells  
135 expressing E2 or HPV16 (compare lanes 2 and 3, respectively, with lane 1) but not in cells  
136 expressing E6/E7 (compare lane 4 with lane 1). This was repeated another two times and the  
137 results quantified (Figure 2C); both E2 and HPV16 induce a significant reduction in TWIST1  
138 protein levels, while E6/E7 do not.

### 139 **E2 binds to the TWIST1 promoter region and directly represses transcription.**

140 Our previous work demonstrated that E2 represses the transcription of innate immune genes by  
141 regulating the DNA methylation of the corresponding promoters (34). To determine whether E2  
142 is also regulating TWIST1 expression via DNA methylation of the promoter, we treated the cells  
143 with 1 $\mu$ M Decitabine, a DNA methylase inhibitor that relieves E2 mediated repression of innate  
144 immune genes (Figure 3). Figure 3A demonstrates that the drug has worked as there is an  
145 increase in both MX1 and IFIT1 when Decitabine is added, as we observed previously (34). The  
146 increase occurs in the vector control cells (compare lanes 3 and 4 versus 1 and 2) but the relief  
147 of repression is greater in the presence of E2 (compare lanes 7 and 8 versus 5 and 6) and  
148 HPV16 (compare lanes 9 and 10 versus 11 and 12); these results duplicate those we observed  
149 previously (34). However, the TWIST1 levels were not altered in any of the cell lines following  
150 treatment with Decitabine. Therefore, TWIST1 is regulated by E2 differently from innate immune  
151 response genes and is independent from DNA methylation.

152 We next investigated whether E2 could directly repress transcription from the TWIST1 promoter.  
153 A construct containing the TWIST1 promoter upstream from the luciferase gene (pTWIST-luc)  
154 was co-transfected with E2 into N/Tert-1 cells to determine whether E2 can repress expression  
155 directly from the TWIST1 promoter (Figure 4A). The expression of E2 resulted in a ~10-fold  
156 reduction in luciferase activity demonstrating that E2 directly represses this promoter. To



157 determine whether E2 can bind directly to the TWIST1 promoter, we carried out a chromatin  
158 immunoprecipitation assay (ChIP) using N/Tert-1+Vec, N/Tert-1+E2 and N/Tert-1+HPV16 cells  
159 using a sheep E2 antibody as previously described (51, 52) (Figure 4B). There was a significant  
160 increase in signal in N/Tert-1+E2 and N/Tert-1+HPV16 when compared with the signal obtained  
161 with N/Tert-1+Vec (compare lanes 2 and 3, respectively, with lane 1), demonstrating that E2  
162 binds to the TWIST1 promoter region when overexpressed but also in the context of the entire  
163 HPV16 genome. We next investigated whether the levels of repressive chromatin markers  
164 implicated in TWIST1 regulation are changed in the presence of E2. H3K9me<sup>2</sup> is a repressive  
165 chromatin marker involved in the regulation of Twist1 expression (53, 54) and the levels of this  
166 marker on the TWIST1 promoter are increased in N/Tert-1+E2 and N/Tert-1+HPV16 when  
167 compared with N/Tert-1+Vec (Figure 4C, compare lanes 2 and 3, respectively, with lane 1).  
168 These results suggest that E2 interacts with the TWIST1 promoter directly and modifies the  
169 local epigenetic environment around the promoter, leading to a reduced level of transcription.

#### 170 **E2 expression reduces the rate of wound healing in N/Tert-1 cells.**

171 The repression of TWIST1 expression by E2 suggested a suppression of the EMT phenotype in  
172 N/Tert-1 cells. EMT is not a defined status, but is a spectrum of phenotypes that range from  
173 epithelial through to fully mesenchymal (47). The N/Tert-1+E2 cells do not look appreciably  
174 different to N/Tert-1 control cells, therefore we propose that there is a subtle influence of E2 on  
175 the EMT status of these cells. During wound healing there is an EMT transition of the wounded  
176 epithelia cells that promotes migration and eventual wound closure (55). Our previous studies  
177 on U2OS cells demonstrated that the expression of E2 slowed the ability of these cells to close  
178 wounds in monolayer cells (32), therefore we carried out “scratch” assays with our N/Tert-1 cells  
179 in order to investigate wound healing. Figure 5A shows images of the results from the wound  
180 healing experiment. 20 hours following wound induction, the wound is almost completely healed  
181 in N/Tert-1+Vec cells (top 3 panels). However, with N/Tert-1+E2 and N/Tert-1+HPV16 there is a

182 failure to close the wound after 20 hours (second and third from top panels, respectively). To  
183 determine whether the oncogenes E6/E7 play a role in regulating wound healing, we also  
184 determined wound closure in N/Tert-1+E6/E7 cells (characterized and described in (34)). The  
185 presence of the viral oncogenes made no difference to the wound healing (compare the bottom  
186 three panels with the top three). Therefore, the failure to close the wound is reflective of  
187 TWIST1 levels and E2 expression. This assay was repeated several times and the data  
188 quantified (Figure 5B). There is a significant delay in wound healing 12 and 20 hours after the  
189 initial “scratch” in both the N/Tert-1+E2 and N/Tert-1+HPV16 cell lines when compared with  
190 N/Tert-1+Vec cells. To confirm that TWIST1 function is also downregulated in the presence of  
191 E2, we monitored expression of TWIST1 target genes Vimentin and N-Cadherin in N/Tert-  
192 1+Vec, N/Tert-1+E2, N/Tert-1+HPV16 and N/Tert-1+E6/E7 cells (Figure 5C). The expression  
193 levels of these TWIST1 target genes are reflective of the TWIST1 levels in the cell. This  
194 demonstrates that there is a functional loss of TWIST1 in E2 and HPV16 expressing N/Tert-1,  
195 and this manifests as alterations in the wound healing phenotype.

196 **E2 and TWIST1 levels inversely correlate in HPV16 positive head and neck cancer cell**  
197 **lines.**

198 Figure 1 demonstrates that there is, on average, less expression of TWIST1 in HPV positive  
199 head and neck cancers when compared with HPV negative head and neck cancers. Our results  
200 suggest that the expression of E2 is influential in the expression of TWIST1 within the HPV  
201 positive group. Previous studies suggested that UMSCC104 contained episomal HPV16  
202 genomes (and therefore retained E2 expression), while UMSCC47 had integrated viral  
203 genomes (and therefore had lost E2 expression). We confirmed that UMSCC104 expressed E2  
204 and that UMSCC47 did not (Figure 6A). We next investigated the TWIST1 levels in these cell  
205 lines. TWIST1 RNA expression was significantly downregulated in UMSCC104 when compared  
206 with UMSCC47 (Figure 6B), and the levels of RNA expression were reflected in a

207 downregulation of TWIST1 protein levels (Figure 6C). The western blots were repeated several  
208 times and quantitated; there is significantly less TWIST1 protein expressed in UMSCC47 when  
209 compared with UMSCC104. The results in these two HPV16 positive head and neck cancer cell  
210 lines support the model of E2 repressing TWIST1 gene expression.

211

212

## 213 **Discussion**

214 The HPV E2 protein plays multiple crucial roles during the viral life cycle. It is essential for  
215 replication of the viral genome, can regulate the segregation of the viral genome into daughter  
216 cells, and has transcriptional properties with the potential to regulate transcription from the viral  
217 and human genomes (9, 56). Regulation of host gene expression by E2, and its importance in  
218 the viral life cycle, is relatively understudied compared with its role in viral replication and  
219 segregation. Our recent work demonstrates that E2 regulates host gene transcription that is  
220 relevant during the viral life cycle (34). That report demonstrated an overlap in the ability of E2  
221 and E6/E7 to repress the expression of innate immune genes. In this current report we extend  
222 our observations on the transcriptional regulatory functions of E2. We demonstrate that E2 can  
223 repress TWIST1 gene expression and that this repression is via a distinct mechanism compared  
224 to innate immune gene repression. E6 and E7 did not affect the levels of TWIST1 RNA and  
225 protein, therefore it is likely that TWIST1 expression is regulated by E2 during the HPV16 life  
226 cycle. For innate immune genes, methylation of the gene promoters played a significant role in  
227 repressing expression, but for TWIST1 DNA methylation plays no role. Rather, E2 binds to the  
228 TWIST1 promoter and actively represses transcription from this region. E2 also increases  
229 H3K9me2 at the promoter, a hallmark of transcriptionally repressed genes previously implicated  
230 in regulation of Twist1 transcription (53). To our knowledge, this is the first time E2 has been  
231 demonstrated to directly bind to a host gene promoter and induce repressive epigenetic  
232 markers. The repression of TWIST1 by E2 resulted in downregulation of TWIST1 target genes  
233 Vimentin and N-Cadherin. During wound healing there is an EMT-like transition that promotes  
234 wound closure, and wound healing in E2 expressing N/Tert-1 is compromised when compared  
235 to parental cells (55).

236 Repression of TWIST1 expression by E2 may play a role in HPV cancer outcomes.

237 Overexpression of TWIST1 is associated with poorer overall survival in head and neck cancer

238 (57), while E2 expression is associated with improved outcomes in HPV positive head and neck  
239 cancer (44-46). We demonstrate here that TWIST1 is downregulated in HPV16 positive tumors  
240 that retain E2 expression when compared with HPV16 tumors that have no E2 expression, or  
241 are HPV negative. We therefore highlight this correlation between E2 expression and TWIST1  
242 repression which may contribute to the better clinical outcomes of HPV16 positive tumors that  
243 retain E2 expression. We demonstrate, in two HPV16 positive head and neck cancer cell lines  
244 (one that is E2 positive, one that is negative), that E2 expression inversely correlates with  
245 TWIST1 expression which correlates with our observations in N/Tert-1 cells and TCGA  
246 datasets. While these lines are not isogenic, they provide a model for studying the repression of  
247 TWIST1 in cancer cell lines that is potentially mediated by expression of the E2 protein. Not all  
248 E2 positive head and neck tumors have downregulation of TWIST1 compared with E2 negative  
249 tumors as evidenced by TCGA data, but there is a significant trend for downregulation. Not only  
250 has elevated TWIST1 been associated with poorer survival in several cancers, including head  
251 and neck, but TWIST1 protein attenuates the response to chemotherapeutic drugs which  
252 provides a rationale for the worse clinical outcomes in high TWIST1 expression patients (47,  
253 55).

254 The mechanism of E2 repression of TWIST1 expression remains to be fully elucidated. The  
255 TWIST1 promoter is methylated in cancer, although this did not correlate with low TWIST1 RNA  
256 or protein levels (58). Methylation does not play a role in the mechanism that E2 uses to repress  
257 TWIST1 levels as treatment of cells with Decitabine did not relieve TWIST1 repression,  
258 therefore E2 uses multiple mechanisms to regulate host gene transcription. We demonstrate  
259 here for the first time that E2 binds to and represses transcription from the TWIST1 promoter  
260 and modifies chromatin around the promoter start site by inducing elevated levels of H3K9me<sup>2</sup>,  
261 a repressive marker. The transcription factor SP1 is involved in the basal transcription levels  
262 from the TWIST1 promoter, and displacement of this factor from the promoter repressed

263 TWIST1 transcription (59). The E2 protein has been shown to displace SP1 from HPV LCRs  
264 resulting in transcriptional repression, and may act similarly on the TWIST1 promoter (60, 61).  
265 This active repression may be required to block TWIST1 expression as STAT3 is activated by  
266 HPV in cervical cancer cells (62), and active STAT3 is an activator of TWIST1 expression,  
267 promoting EMT (63). We demonstrate here that there is an increase in the level of the  
268 repressive marker H3K9me2 at the TWIST1 promoter in the presence of E2. The chromatin  
269 repressor NURD complex can be recruited to the TWIST1 promoter via DOC1, resulting in  
270 transcriptional repression via induction of a nucleosome on the TWIST1 promoter. It is feasible  
271 that E2 recruits a repressor complex to the TWIST1 promoter in order to regulate transcriptional  
272 repression via nucleosome assembly (64). E2 functionally interacts with BRD4, and this  
273 interaction is involved in regulating E2 repression of the viral LCR. Again, such a mechanism  
274 may be used by E2 to contribute to the repression of the TWIST1 promoter (65). Future studies  
275 will characterize the mechanism(s) that E2 uses to repress the TWIST1 promoter. Enhancing  
276 our understanding of this mechanism is important as E2 offers a model system for repressing  
277 TWIST1 transcription. For example, if H3K9me<sup>2</sup> methylation of the TWIST1 promoter is a major  
278 contributor to repression by E2 then induction of this modification via drug treatment could be an  
279 opportunity to promote a better response of high TWIST1 expressing tumors to  
280 chemotherapeutic agents. In addition, if TWIST1 repression is an important mechanism  
281 promoting the HPV16 life cycle in epithelial cells, then reversing this repression offers an  
282 opportunity to disrupt this process and alleviate HPV16 infections and disease.

283 Another question is: why does HPV16 repress the expression of TWIST1? While TWIST1  
284 expression is important in mouse embryogenesis, demonstrating an important role in cellular  
285 proliferation and differentiation, there is less known about the effect of TWIST1 on epithelial cell  
286 differentiation (37). HPV manipulate epithelial differentiation in order to create an environment  
287 that supports viral replication (66). While TWIST1 is clearly a promoter of EMT, the effect of this

288 protein on the epithelial differentiation pathway is less clear and is worthy of future study.  
289 Perhaps the repression of TWIST1 plays a role in promoting an environment that allows HPV16  
290 replication in the infected epithelium. TWIST1 and HPV16 E2 interact with the NF- $\kappa$ B pathway  
291 and downregulation of TWIST1 may promote the ability of E2 to regulate NF- $\kappa$ B, which could be  
292 important for the HPV16 life cycle (67, 68). TWIST1 has been shown to downregulate  
293 expression of C/EBP $\alpha$ , a protein that E2 functionally interacts with to regulate transcription (27,  
294 69). Therefore, downregulation of TWIST1 expression may prevent disruption of E2's ability to  
295 regulate host gene transcription via C/EBP $\alpha$  during the viral life cycle. Recently, it has been  
296 demonstrated that C/EBP $\alpha$  is a crucial factor for epithelial maintenance and prevents EMT, thus  
297 E2 downregulation of TWIST1 may enhance the ability of C/EBP $\alpha$  to carry out this function (70).  
298 This would also promote the enhanced epithelial status of the E2 positive cells.

299 In conclusion, this report demonstrates that HPV16 E2 downregulates the expression of  
300 TWIST1. This occurs in cells that contain the entire HPV16 genome, and also occurs in HPV16  
301 positive cancers that are E2 positive. Given the important role that TWIST1 plays in EMT,  
302 cancer outcomes, and response to chemotherapeutic agents, a fuller understanding of the  
303 interaction of HPV16 with TWIST1 is warranted.

304

305 **Materials and Methods.**

306 **Differential expression in TCGA.** Head and neck squamous cell carcinoma (HNSCC) TWIST1  
307 mRNA expression data were obtained from The Cancer Genome Atlas using cBio Cancer  
308 Genomics Portal (49, 50). HNSCC tumor samples (Firehose Legacy) were analyzed for HPV  
309 status and viral genome integration as previously described utilizing HPV16 E2:E7 ratio of  
310 mRNA sequencing reads (46, 71). Samples without available TWIST1 mRNA expression data  
311 were omitted. Data for 528 HNSC samples were available. Of these, 522 were identified with  
312 available TWIST1 mRNA expression and HPV status which was correlated and reported using  
313 R. Statistical analysis was performed using two-way student's t-test with Bonferroni correction  
314 for two comparisons.

315 **Cell culture.** Low passage N/Tert-1 with stably expressing HPV16, 16E2 and 16E6+E7 were  
316 generated as previously described and characterized in previous studies.(31-35). These cells  
317 were cultured alongside empty vector, drug selected pcDNA™ 3 with 111µg/mL G418 Sulfate  
318 (Gentamicin) (Thermo Fisher Scientific). All N/Tert-1 cells were grown in keratinocyte serum-free  
319 medium (K-SFM;Invitrogen) with a 1% (vol/vol) penicillin-streptomycin mixture (Thermo Fisher  
320 Scientific) containing 4µg/ml hygromycin B (Millipore Sigma) at 37°C in 5% CO<sub>2</sub> and passaged  
321 every 3 to 4 days. UMSCC47 and UMSCC104 cell lines were obtained from Millipore Sigma  
322 (Catalog # SCC071 and # SCC072 respectively). UMSCC47 cells were grown in Dulbecco's  
323 modified Eagle's medium (DMEM) (Invitrogen) supplemented with 10% (vol/vol) fetal bovine  
324 serum (FBS) (Invitrogen). UMSCC104 cells were grown in Eagle's minimum essential medium  
325 (EMEM) (Invitrogen) supplemented with nonessential amino acids (NEAA) (Gibco) and 10%  
326 (vol/vol) FBS. All cells were routinely checked for mycoplasma contamination. For protein and  
327 RNA analyses, 1 x 10<sup>6</sup> cells were plated onto 100-mm<sup>2</sup> plates, trypsinized and washed twice  
328 with 1X phosphate-buffered saline (1X PBS).



329 **SYBR green qRT-PCR.** RNA was isolated using the SV Total RNA isolation system (Promega)  
330 following the manufacturer's instructions. 2 µg of RNA was reverse transcribed into cDNA using  
331 the high-capacity reverse transcription kit (Applied Biosystems). cDNA and relevant primers  
332 were added to PowerUp SYBR green master mix (Applied Biosystems) and real-time PCR was  
333 performed using 7500 Fast real-time PCR system. The primer sequences utilized were as  
334 follows: Twist1 Forward (F), 5'-GTCCGCAGTCTTACGAGGAG-3'; Twist1 Reverse (R), 5'-  
335 GCTTGAGGGTCTGAATCTTGCT-3', HPV16 E2 F, 5'-ATGGAGACTCTTTGCCAACG-3';  
336 HPV16 E2 R, 5'-TCATATAGACATAAATCCAG-3', VIM (Vimentin) F, 5'-  
337 GACGCCATCAACACCGAGTT-3'; VIM R, 5'-CTTTGTCGTTGGTTAGCTGGT-3', CDH2 (N-  
338 Cadherin) F, 5'-AGCCAACCTTAAGTGGAGGAGT-3'; CDH2 R, 5'-  
339 GGCAAGTTGATTGGAGGGATG-3'.

340 **Decitabine treatment.** N/Tert-1 cells were plated at a density of  $1.5 \times 10^5$  in 6-well plates (60-  
341 mm<sup>2</sup>/well). The following day, cells were treated with 1µM Decitabine or 1µM DMSO for 72-  
342 hours as previously described (34). Afterwards, the cells were harvested and processed for  
343 qRT-PCR as described above.

344 **Immunoblotting.** N/Tert-1, UMSCC47 and UMSCC104 cells were trypsinized, washed with 1X  
345 PBS and resuspended in 2x pellet volume protein lysis buffer (0.5% Nonidet P-40, 50mM Tris  
346 [pH 7.8], 150 mM NaCl) supplemented with protease inhibitor (Roche Molecular Biochemicals)  
347 and phosphatase inhibitor cocktail (Sigma). Cell suspension was lysed for 30 min on ice and  
348 then centrifuged for 20 min at 184,000 rcf at 4°C. Protein concentration was determined using  
349 the Bio-Rad protein estimation assay. 25µg protein samples were boiled in equal volume 2x  
350 Laemmli sample buffer (Bio-Rad). Samples were run down a Novex 4-12% Tris-glycine gel  
351 (Invitrogen) and transferred onto a nitrocellulose membrane (Bio-Rad) at 30V overnight using  
352 the wet blot method. Membranes were blocked with Odyssey (PBS) blocking buffer (diluted 1:1  
353 with 1X PBS) at room temperature for 1 hour and probed with indicated primary antibody diluted

354 in Odyssey blocking buffer. Membranes were then washed with PBS supplemented with 0.1%  
355 Tween (PBS-Tween) and probed with the indicated Odyssey secondary antibody (goat anti-  
356 mouse IRdye 800CW or goat anti-rabbit IRdye 680CW) diluted in Odyssey blocking buffer at  
357 1:10,000. Membranes were washed and underwent infrared scanning using the Odyssey CLx  
358 Li-Cor imaging system. Immunoblots were quantified using ImageJ. The following primary  
359 antibodies were used for immunoblotting: HPV16 E2 (TVG 261) at 1:1000 dilution from Abcam;  
360 Glyceraldehyde-3-phosphate dehydrogenase (GAPDH) (sc-47724) and p53 (sc-47698) at  
361 1:1000 dilution from Santa Cruz Biotechnology and Twist1 (25465-1-AP) at 1:300 from  
362 Proteintech.

363 **Chromatin Immunoprecipitation (ChIP).** N/Tert-1 cells were plated at a density of  $2 \times 10^6$  in  
364 150mm<sup>2</sup> plates. The following day, the cells were harvested via scraping and processed for  
365 chromatin as previously described (72). Chromatin concentration was determined with a  
366 NanoDrop spectrophotometer. Approximately 100µg of chromatin was used per antibody  
367 experiment. The following antibodies were used for ChIP: 2µl sheep anti-HPV16 E2 (amino  
368 acids 1 to 201) prepared and purified by Dundee Cell Products, United Kingdom; 2µg rabbit  
369 anti-Histone H3K9me<sub>2</sub> (Abcam, ab12220). Chromatin was then processed for qPCR. ChIP DNA  
370 primers: Twist1 F, 5'-TCAGGCCAATGACACTGCT-3'; Twist1 R, 5'-  
371 GACGGTGTGGATGGCCCCGA-3'.

372 **Transcription Assay.**  $5 \times 10^5$  N/Tert-1 cells were plated out on 100-mm<sup>2</sup> plates and transfected  
373 24 hours later with either 1µg HPV16 E2 plasmid and 1µg pTWIST1-Luc, or 1µg pTWIST1-Luc  
374 alone using Lipofectamine 3000 (ThermoFisher Scientific) according to the manufacturer's  
375 instructions as previously described (73). pTWIST1-luc contains the human promoter and has  
376 been described previously (74, 75). Briefly, the cells were harvested 72-hours post transfection  
377 utilizing the Promega reporter lysis buffer and analyzed for luciferase using the Promega  
378 luciferase assay system. Concentrations were normalized to protein levels, as measured by the

379 Bio-Rad protein estimation assay mentioned above. Relative fluorescence units were measured  
380 using the BioTek Synergy H1 hybrid reader.

381 **Wound healing assay.**  $2.5 \times 10^5$  N/Tert-1 cells were plated at the center of 6-well plates (60-  
382  $\text{mm}^2/\text{well}$ ). The cells were left to grow to confluency. Afterwards the monolayer was scratched  
383 using a 1000 $\mu\text{L}$  pipette tip, creating an  $\sim 1\text{mm}$  wound. Wounds were imaged at 0, 12 and 20-  
384 hour intervals (Zeiss, Axiovert 200 M microscope). Multiple images were taken randomly along  
385 the wounds and measurements were taken from leading cell edge. Wound was measured using  
386 ImageJ software and wound healing was calculated as a ratio of the 0h timepoint.

387 **Statistical Analyses.** The standard error was calculated from no less than three independent  
388 experiments. The only exception was in the TWIST1-Luc Transcription assay where statistical  
389 power was achieved after 2 replicates. Significance was determined using two-tailed student's *t*  
390 test. Bonferroni correction for significance was utilized when indicated.

391

392 **Acknowledgements**

393 This work was supported by VCU Philips Institute for Oral Health Research and the National  
394 Cancer Institute Designated Massey Cancer Center grant P30 CA016059 (IMM), and by NCI  
395 5R01CA210911 (AA) and 5R01CA240484 (AA). We thank Dr. Lu-Hai Wang for pTWIST1-luc.

396

397

398 **Figure 1**

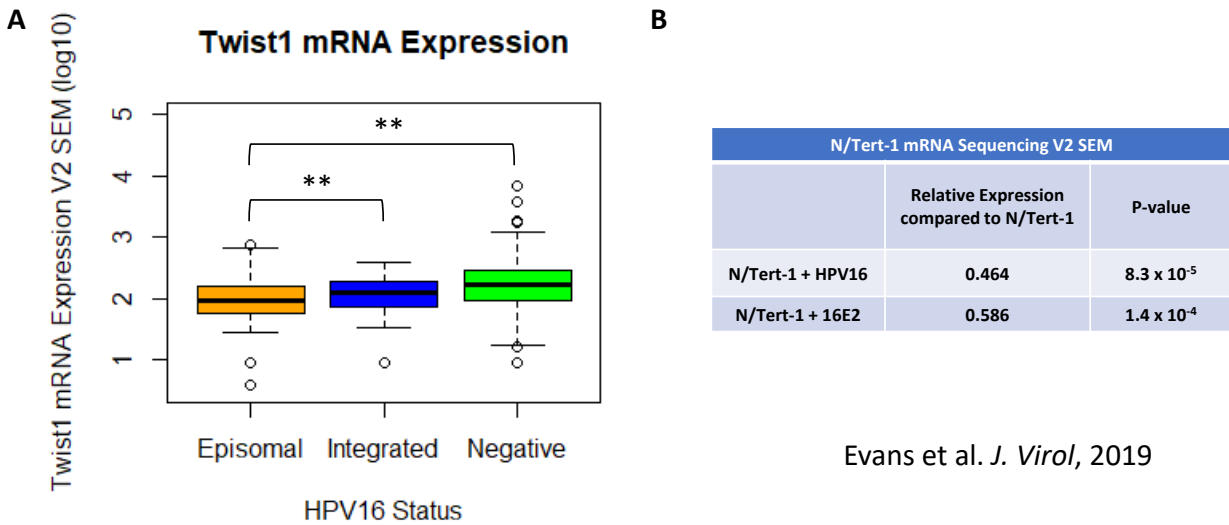

399

400 **Figure 1. TWIST1 expression is downregulated by HPV16 E2.** (A) 528 samples were  
 401 previously evaluated for HPV genome status utilizing E2-E7 ratio of mRNA-sequencing reads  
 402 (48, 76). 466 samples were HPV negative. 40 samples retained HPV16 episome status and 17  
 403 samples had integrated HPV16 genomes. Firehose Legacy Twist1 mRNA expression data was  
 404 obtained using cBioPortal. TWIST1 mRNA between HPV16 Status was then compared using  
 405 two-tailed Student's T-Test. Vertical axis in log(10). (B) N/Tert-1 RNA-sequencing results  
 406 adapted from (34). TWIST1 expression was compared to parental N/Tert-1 cells with no HPV16  
 407 or HPV16 E2. \*P-value <0.05 using Bonferroni correction when applicable.

408 **Figure 2**

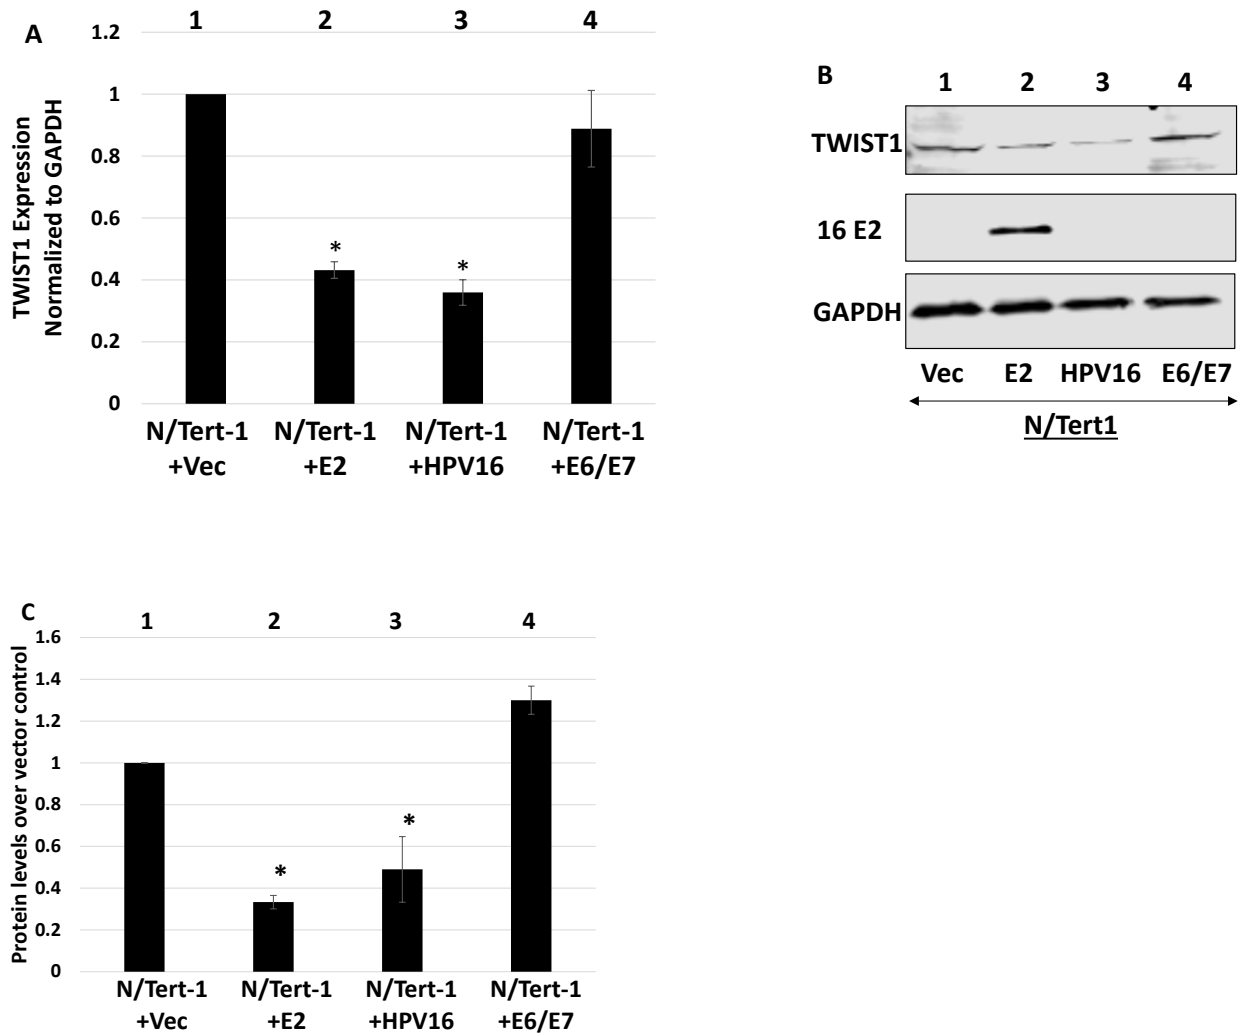

409

410

411 **Figure 2. TWIST1 RNA and protein levels are downregulated by E2 and the HPV16**  
412 **genome in N/Tert-1 cells.** (A) qRT-PCR of N/Tert1 lines with E2 (lane 2), HPV16 (lane 3), E6  
413 and E7 (lane 4) or empty pCDNA3.1 vector (lane 1). Results are expressed as fold change from  
414 that observed in the vector control N/Tert-1 cells (lane 1). (B) Western blot analysis was carried  
415 out on protein extracted from N/Tert-1 cells with empty vector (lane 1), or those with E2, HPV16  
416 or E6 and E7 (Lanes 2-4). GAPDH is shown as an internal control. Western blots were  
417 visualized using a Li-Cor system. (C) Western blots were quantitated and TWIST1 protein  
418 expression was calculated relative to vector using ImageJ. Data in panels A and C represent the

419 averages of at least 3 independent experiments, and error bars indicate standard error of the  
420 mean. \*,  $P < 0.05$

421 **Figure 3.**

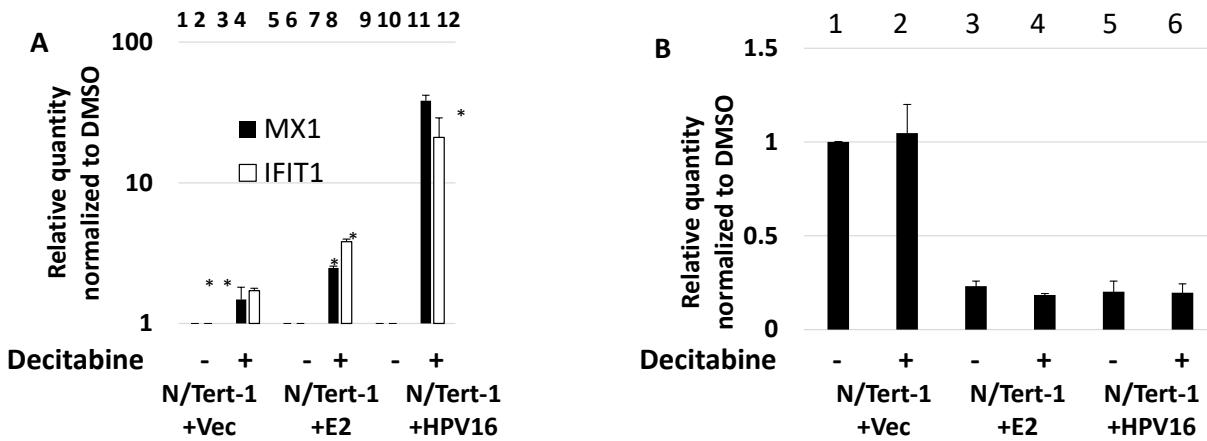

422

423 **Figure 3. TWIST1 expression is not repressed by E2 via methylation of the gene**

424 **promoter.** N/Tert-1 cells were treated with 1 $\mu$ M Decitabine (5-aza-cytidine) for 72 hours.

425 Afterwards, cells were harvested and processed for RNA which was reverse transcribed into

426 cDNA. (A) qRT-PCR on N/Tert-1 cells for innate immune genes MX1 and IFIT1 illustrates robust

427 restoration of expression following Decitabine treatment. Results are expressed as fold change

428 from that observed in the untreated, vector control N/Tert-1 cells. (B) The same cDNA was then

429 analyzed for TWIST1 expression. Unlike the innate immune genes, Decitabine does not restore

430 TWIST1 repression. Data in panels A and B represent the mean of two independent

431 experiments, and error bars indicate standard error of the mean. \*,  $P < 0.05$



432 **Figure 4.**

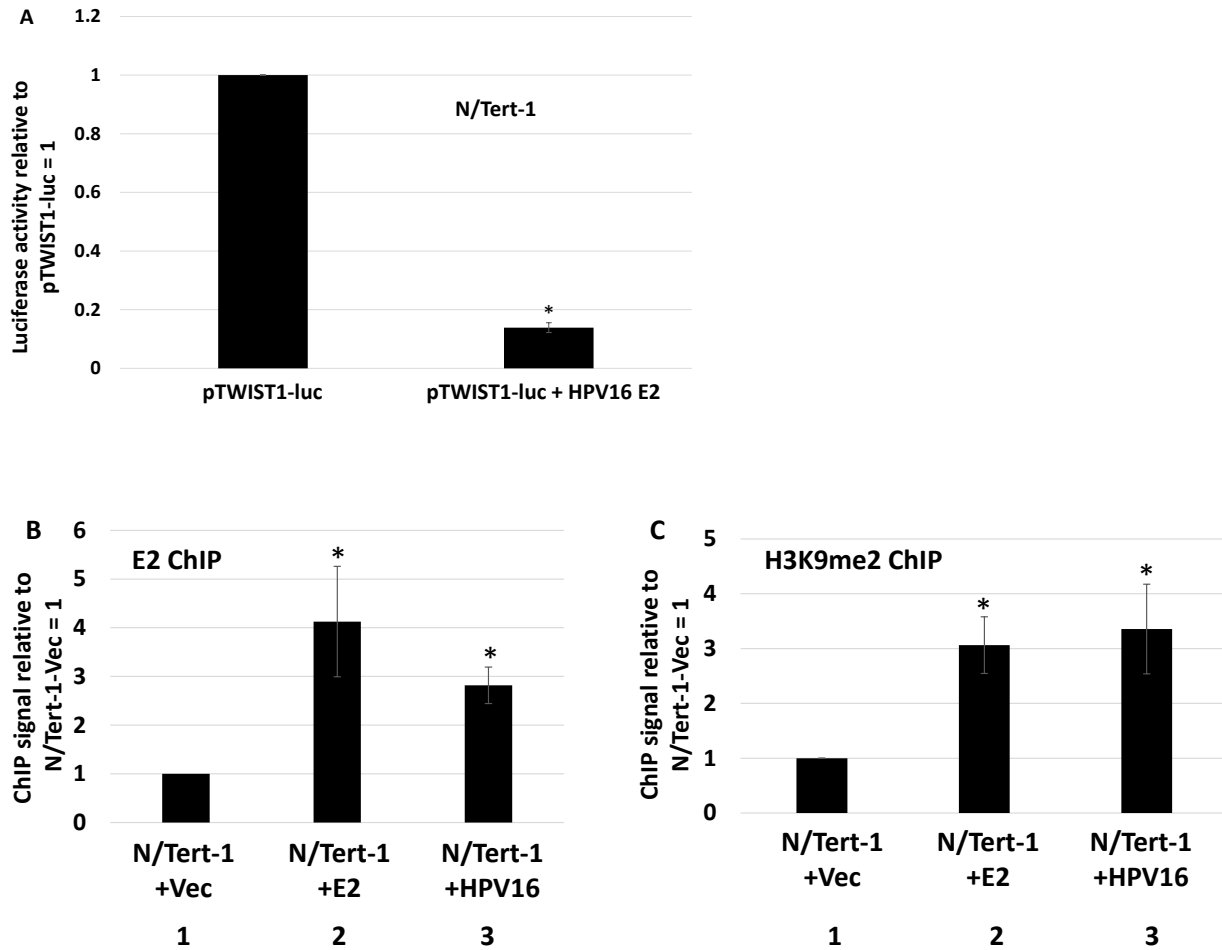

435  
436 **Figure 4. E2 binds to the TWIST1 promoter and actively represses transcription.** (A)  
437 N/Tert1 cells were transfected with 1  $\mu$ g of pTWIST1-luc alone or with 1  $\mu$ g HPV16 E2. Forty-  
438 eight hours after transfection, a luciferase-based assay was utilized to monitor levels of TWIST1  
439 promoter activation. Data was obtained as relative fluorescence units (RFU), normalized to total  
440 protein concentration as monitored by a standard bovine serum albumin (BSA) assay, and  
441 presented as relative to pTWIST1-luc only transfection. (B) Chromatin immunoprecipitation of  
442 E2 onto the TWIST1 promoter. In both E2 (lane 2) and HPV16 cells (lane 3), E2 was observed  
443 directly binding to the promoter region of TWIST1. (C) E2 binding at the Twist1 promoter leads  
444 to accumulation of repressive histone marker H3K9me<sub>2</sub>. Once again, this repressive marker was

445 upregulated in both E2 (lane 2) and HPV16 expressing (lane 3) N/Tert-1 cells. Results were  
446 normalized to input DNA and expressed as fold change over vector control N/Tert-1. Data  
447 represent the mean of at least three independent experiments, and error bars depict standard  
448 error of the mean. \*,  $P < 0.05$

449 **Figure 5**

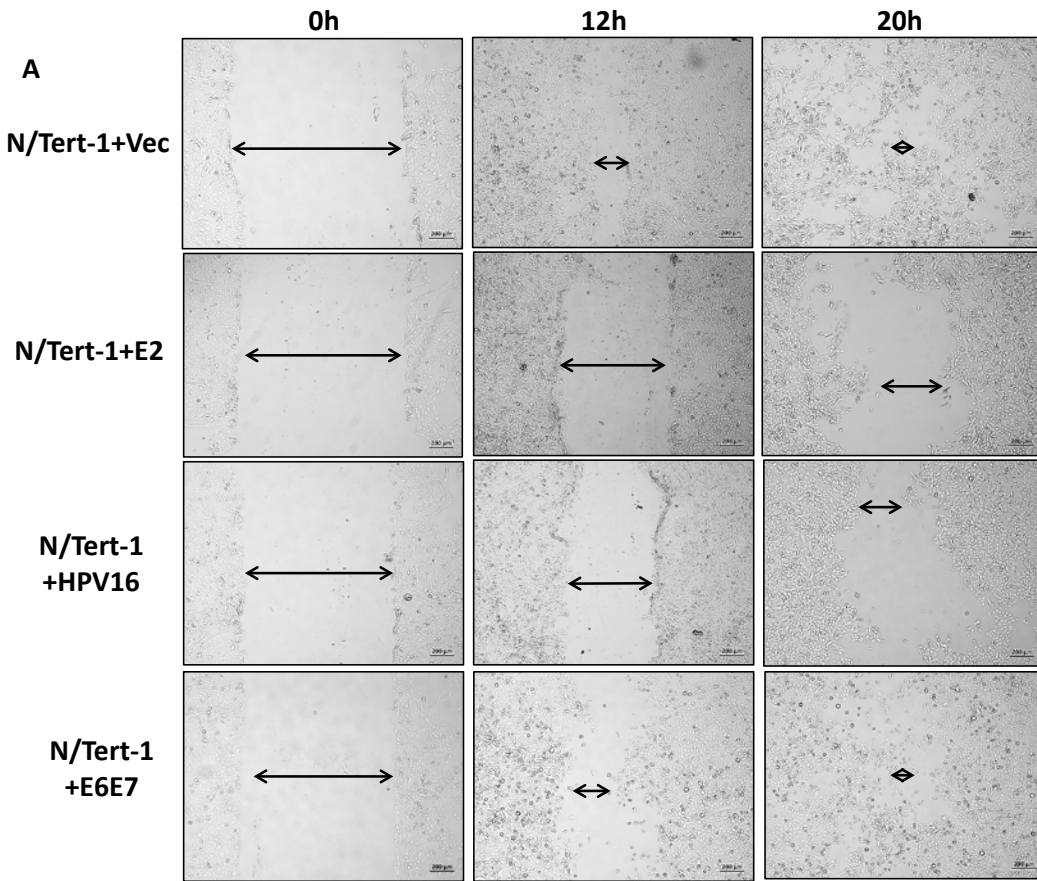

450

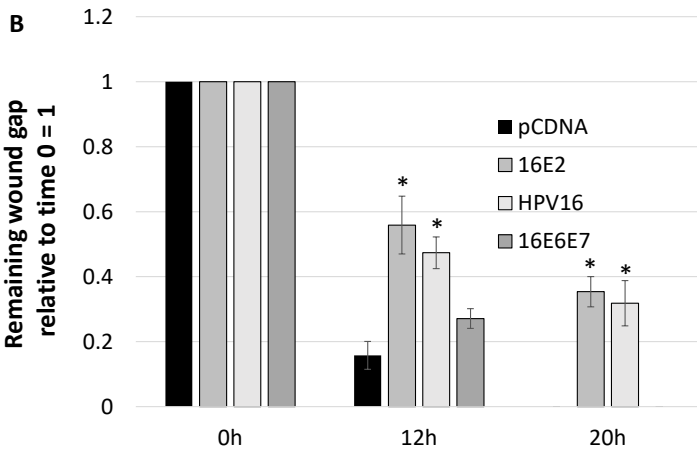

451

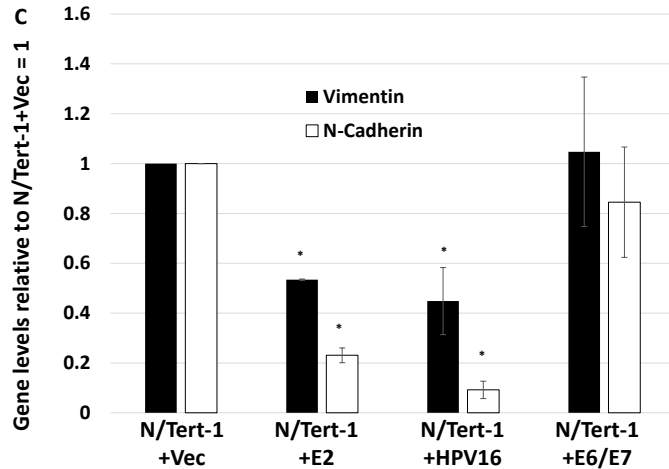

452

453

454 **Figure 5. E2 expression correlates with attenuated ability to wound heal.** (A) N/Tert-1 cells

455 were plated and allowed to grow to near confluency. Afterwards an ~1mm scratch was made in

456 the cell monolayer using a pipette tip. The wound gap was imaged and measured at the same

457 field at 0, 12 and 20 hours. Arrows have been added for clarity. Size bars have been added at

458 the bottom-right of each image to illustrate a length of 200 microns. (B) The remaining wound

459 gap was calculated relative to time 0 for each field. By 20h, the Vector and E6E7 cells have

460 completely closed wound gaps while the E2 and HPV16 cells retain considerable gaps. (C)

461 Repression of Twist1 by E2 and HPV16 leads to reduction in EMT marker expression. N/Tert-1

462 cells were harvested for RNA and processed for cDNA. qRT-PCR was performed for TWIST1

463 target genes CDH2 and VIM which encode the proteins N-Cadherin and Vimentin respectively.

464 Results are expressed as fold change from that observed in the vector control N/Tert-1 cells

465 (lane 1). Data represent the mean of at least three independent experiments, and error bars

466 depict standard error of the mean. \*,  $P < 0.05$

467 Figure 6

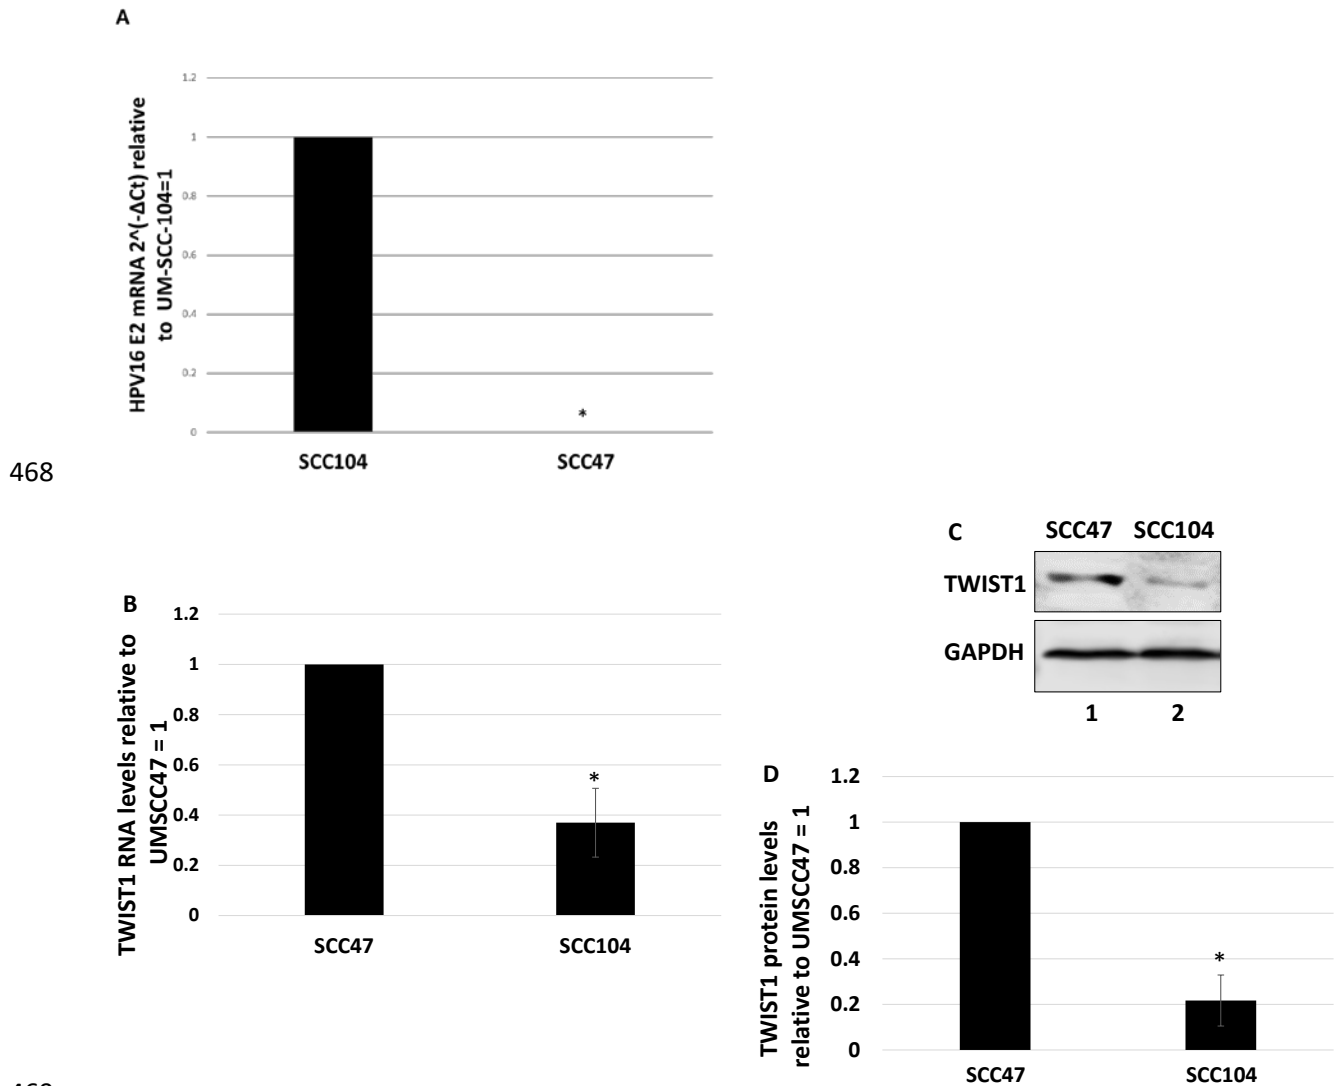

469

470 **Figure 6. Expression of TWIST1 inversely correlates with E2 expression in head and neck**

471 **cancer cell lines.** (A) qRT-PCR for HPV16 E2 expression in UM-SCC-104 and UM-SCC-47 cell

472 lines. Results are expressed as  $2^{(-\Delta Ct)}$  using GAPDH as internal control. Integrated UM-SCC-47

473 exhibited no Ct change over negative experimental control, illustrating no presence of E2

474 mRNA. (B) The same cDNA in panel A were analyzed for TWIST1 expression. Episomal UM-

475 SCC-104 have lower TWIST1 transcription levels compared to UM-SCC-47. Results are

476 expressed as relative fold change from that observed in UM-SCC-47 cells. (C) Western blot

477 analysis was carried out on protein extracted from the cells in panels A and B. Decreased

478 TWIST1 transcription leads to reduced expression on the protein level in UM-SCC-104  
479 compared to UM-SCC-47 cells. GAPDH is shown as internal control. Western blots were  
480 repeated and quantitated and TWIST1 protein expression was calculated relative to UM-SCC-  
481 47 protein levels using ImageJ. Data represent the averages of at least 3 independent  
482 experiments, and error bars indicate standard error of the mean. \*,  $P < 0.05$

- 483 1. zur Hausen H. 2009. Papillomaviruses in the causation of human cancers - a brief historical  
484 account. *Virology* 384:260-265.
- 485 2. Marur S, D'Souza G, Westra WH, Forastiere AA. 2010. HPV-associated head and neck cancer: a  
486 virus-related cancer epidemic. *The Lancet Oncology* 11:781-789.
- 487 3. Gillison ML, Koch WM, Capone RB, Spafford M, Westra WH, Wu L, Zahurak ML, Daniel RW,  
488 Viglione M, Symer DE, Shah KV, Sidransky D. 2000. Evidence for a causal association between  
489 human papillomavirus and a subset of head and neck cancers. *Journal of the National Cancer*  
490 *Institute* 92:709-720.
- 491 4. Ang KK, Harris J, Wheeler R, Weber R, Rosenthal DI, Nguyen-TÃ¡n PF, Westra WH, Chung CH,  
492 Jordan RC, Lu C, Kim H, Axelrod R, Silverman CC, Redmond KP, Gillison ML. 2010. Human  
493 papillomavirus and survival of patients with oropharyngeal cancer. *The New England journal of*  
494 *medicine* 363:24-35.
- 495 5. Gillison ML. 2004. Human papillomavirus-associated head and neck cancer is a distinct  
496 epidemiologic, clinical, and molecular entity. *Seminars in oncology* 31:744-754.
- 497 6. Thierry F. 2009. Transcriptional regulation of the papillomavirus oncogenes by cellular and viral  
498 transcription factors in cervical carcinoma. *Virology* 384:375-379.
- 499 7. Hoppe-Seyler K, Bossler F, Braun JA, Herrmann AL, Hoppe-Seyler F. 2018. The HPV E6/E7  
500 Oncogenes: Key Factors for Viral Carcinogenesis and Therapeutic Targets. *Trends in*  
501 *microbiology* 26:158-168.
- 502 8. Songcock WK, Kim SM, Bodily JM. 2017. The human papillomavirus E7 oncoprotein as a regulator  
503 of transcription. *Virus research* 231:56-75.
- 504 9. McBride AA. 2013. The Papillomavirus E2 proteins. *Virology* 445:57-79.
- 505 10. Benson JD, Howley PM. 1995. Amino-terminal domains of the bovine papillomavirus type 1 E1  
506 and E2 proteins participate in complex formation. *Journal of virology* 69:4364-4372.
- 507 11. Bergvall M, Melendy T, Archambault J. 2013. The E1 proteins. *Virology* 445:35-56.
- 508 12. Loo YM, Melendy T. 2004. Recruitment of replication protein A by the papillomavirus E1 protein  
509 and modulation by single-stranded DNA. *Journal of virology* 78:1605-1615.
- 510 13. Han Y, Loo YM, Militello KT, Melendy T. 1999. Interactions of the papovavirus DNA replication  
511 initiator proteins, bovine papillomavirus type 1 E1 and simian virus 40 large T antigen, with  
512 human replication protein A. *Journal of virology* 73:4899-4907.
- 513 14. Melendy T, Sedman J, Stenlund A. 1995. Cellular factors required for papillomavirus DNA  
514 replication. *Journal of virology* 69:7857-7867.
- 515 15. Doorbar J, Quint W, Banks L, Bravo IG, Stoler M, Broker TR, Stanley MA. 2012. The biology and  
516 life-cycle of human papillomaviruses. *Vaccine* 30 Suppl 5:F55-70.
- 517 16. Vance KW, Campo MS, Morgan IM. 2001. A novel silencer element in the bovine papillomavirus  
518 type 4 promoter represses the transcriptional response to papillomavirus E2 protein. *Journal of*  
519 *virology* 75:2829-2838.
- 520 17. Vance KW, Campo MS, Morgan IM. 1999. An enhanced epithelial response of a papillomavirus  
521 promoter to transcriptional activators. *The Journal of biological chemistry* 274:27839-27844.
- 522 18. Bouvard V, Storey A, Pim D, Banks L. 1994. Characterization of the human papillomavirus E2  
523 protein: evidence of trans-activation and trans-repression in cervical keratinocytes. *The EMBO*  
524 *journal* 13:5451-5459.
- 525 19. Demeret C, Desaintes C, Yaniv M, Thierry F. 1997. Different mechanisms contribute to the E2-  
526 mediated transcriptional repression of human papillomavirus type 18 viral oncogenes. *Journal of*  
527 *virology* 71:9343-9349.
- 528 20. Romanczuk H, Thierry F, Howley PM. 1990. Mutational analysis of cis elements involved in E2  
529 modulation of human papillomavirus type 16 P97 and type 18 P105 promoters. *Journal of*  
530 *virology* 64:2849-2859.

- 531 21. Oldak M, Maksym RB, Sperling T, Yaniv M, Smola H, Pfister HJ, Malejczyk J, Smola S. 2010.  
532 Human papillomavirus type 8 E2 protein unravels JunB/Fra-1 as an activator of the beta4-  
533 integrin gene in human keratinocytes. *Journal of virology* 84:1376-1386.
- 534 22. Delcuratolo M, Fertey J, Schneider M, Schuetz J, Leiprecht N, Hudjetz B, Brodbeck S, Corall S,  
535 Dreer M, Schwab RM, Grimm M, Wu SY, Stubenrauch F, Chiang CM, Iftner T. 2016.  
536 Papillomavirus-Associated Tumor Formation Critically Depends on c-Fos Expression Induced by  
537 Viral Protein E2 and Bromodomain Protein Brd4. *PLoS pathogens* 12:e1005366.
- 538 23. Muhlen S, Behren A, Iftner T, Simon C. 2010. Influence of HPV16 E2 and its localisation on the  
539 expression of matrix metalloproteinase-9. *International journal of oncology* 37:337-345.
- 540 24. Muhlen S, Behren A, Iftner T, Plinkert PK, Simon C. 2009. AP-1 and ERK1 but not p38 nor JNK is  
541 required for CRPV early protein 2-dependent MMP-9 promoter activation in rabbit epithelial  
542 cells. *Virus research* 139:100-105.
- 543 25. Behren A, Simon C, Schwab RM, Loetzsch E, Brodbeck S, Huber E, Stubenrauch F, Zenner HP,  
544 Iftner T. 2005. Papillomavirus E2 protein induces expression of the matrix metalloproteinase-9  
545 via the extracellular signal-regulated kinase/activator protein-1 signaling pathway. *Cancer*  
546 *research* 65:11613-11621.
- 547 26. Wu MH, Chan JY, Liu PY, Liu ST, Huang SM. 2007. Human papillomavirus E2 protein associates  
548 with nuclear receptors to stimulate nuclear receptor- and E2-dependent transcriptional  
549 activations in human cervical carcinoma cells. *The international journal of biochemistry & cell*  
550 *biology* 39:413-425.
- 551 27. Hadaschik D, Hinterkeuser K, Oldak M, Pfister HJ, Smola-Hess S. 2003. The Papillomavirus E2  
552 protein binds to and synergizes with C/EBP factors involved in keratinocyte differentiation.  
553 *Journal of virology* 77:5253-5265.
- 554 28. Sunthamala N, Pang CL, Thierry F, Teissier S, Pientong C, Ekalaksananan T. 2014. Genome-wide  
555 analysis of high risk human papillomavirus E2 proteins in human primary keratinocytes.  
556 *Genomics data* 2:147-149.
- 557 29. Sunthamala N, Thierry F, Teissier S, Pientong C, Kongyingyoes B, Tangsiriwatthana T,  
558 Sangkomkamhang U, Ekalaksananan T. 2014. E2 proteins of high risk human papillomaviruses  
559 down-modulate STING and IFN-kappa transcription in keratinocytes. *PLoS one* 9:e91473.
- 560 30. Thierry Fo, Benotmane MA, Demeret C, Carcinogenesis P, Desaintes C. 2004. A Genomic  
561 Approach Reveals a Novel Mitotic Pathway in Papillomavirus Carcinogenesis A Genomic  
562 Approach Reveals a Novel Mitotic Pathway in.895-903.
- 563 31. Gauson EJ, Wang X, Dornan ES, Herzyk P, Bristol M, Morgan IM. 2016. Failure to interact with  
564 Brd4 alters the ability of HPV16 E2 to regulate host genome expression and cellular movement.  
565 *Virus research* 211:1-8.
- 566 32. Gauson EJ, Windle B, Donaldson MM, Caffarel MM, Dornan ES, Coleman N, Herzyk P, Henderson  
567 SC, Wang X, Morgan IM. 2014. Regulation of human genome expression and RNA splicing by  
568 human papillomavirus 16 E2 protein. *Virology* 468-470:10-18.
- 569 33. Evans MR, James CD, Loughran O, Nulton TJ, Wang X, Bristol ML, Windle B, Morgan IM. 2017. An  
570 oral keratinocyte life cycle model identifies novel host genome regulation by human  
571 papillomavirus 16 relevant to HPV positive head and neck cancer. *Oncotarget*  
572 doi:10.18632/oncotarget.18328 [doi].
- 573 34. Evans MR, James CD, Bristol ML, Nulton TJ, Wang X, Kaur N, White EA, Windle B, Morgan IM.  
574 2019. Human Papillomavirus 16 E2 Regulates Keratinocyte Gene Expression Relevant to Cancer  
575 and the Viral Life Cycle. *J Virol* 93.
- 576 35. James CD, Prabhakar AT, Otoa R, Evans MR, Wang X, Bristol ML, Zhang K, Li R, Morgan IM. 2019.  
577 SAMHD1 Regulates Human Papillomavirus 16-Induced Cell Proliferation and Viral Replication  
578 during Differentiation of Keratinocytes. *mSphere* 4.



- 579 36. Wang SM, Coljee VW, Pignolo RJ, Rotenberg MO, Cristofalo VJ, Sierra F. 1997. Cloning of the  
580 human twist gene: its expression is retained in adult mesodermally-derived tissues. *Gene*  
581 187:83-92.
- 582 37. Chen ZF, Behringer RR. 1995. twist is required in head mesenchyme for cranial neural tube  
583 morphogenesis. *Genes Dev* 9:686-99.
- 584 38. Mani SA, Guo W, Liao MJ, Eaton EN, Ayyanan A, Zhou AY, Brooks M, Reinhard F, Zhang CC,  
585 Shipitsin M, Campbell LL, Polyak K, Briskin C, Yang J, Weinberg RA. 2008. The epithelial-  
586 mesenchymal transition generates cells with properties of stem cells. *Cell* 133:704-15.
- 587 39. Rhim AD, Mirek ET, Aiello NM, Maitra A, Bailey JM, McAllister F, Reichert M, Beatty GL, Rustgi  
588 AK, Vonderheide RH, Leach SD, Stanger BZ. 2012. EMT and dissemination precede pancreatic  
589 tumor formation. *Cell* 148:349-61.
- 590 40. Singh A, Settleman J. 2010. EMT, cancer stem cells and drug resistance: an emerging axis of evil  
591 in the war on cancer. *Oncogene* 29:4741-51.
- 592 41. Ye X, Tam WL, Shibue T, Kaygusuz Y, Reinhardt F, Ng Eaton E, Weinberg RA. 2015. Distinct EMT  
593 programs control normal mammary stem cells and tumour-initiating cells. *Nature* 525:256-60.
- 594 42. Tam WL, Weinberg RA. 2013. The epigenetics of epithelial-mesenchymal plasticity in cancer. *Nat*  
595 *Med* 19:1438-49.
- 596 43. Terry S, Savagner P, Ortiz-Cuaran S, Mahjoubi L, Saintigny P, Thiery JP, Chouaib S. 2017. New  
597 insights into the role of EMT in tumor immune escape. *Mol Oncol* 11:824-846.
- 598 44. Anayannis NV, Schlecht NF, Ben-Dayam M, Smith RV, Belbin TJ, Ow TJ, Blakaj DM, Burk RD,  
599 Leonard SM, Woodman CB, Parish JL, Prystowsky MB. 2018. Association of an intact E2 gene  
600 with higher HPV viral load, higher viral oncogene expression, and improved clinical outcome in  
601 HPV16 positive head and neck squamous cell carcinoma. *PLoS one* 13:e0191581.
- 602 45. Ramqvist T, Mints M, Tertipis N, Nasman A, Romanitan M, Dalianis T. 2015. Studies on human  
603 papillomavirus (HPV) 16 E2, E5 and E7 mRNA in HPV-positive tonsillar and base of tongue cancer  
604 in relation to clinical outcome and immunological parameters. *Oral oncology* 51:1126-1131.
- 605 46. Nulton TJ, Kim N-K, DiNardo LJ, Morgan IM, Windle B. 2018. Patients with integrated HPV16 in  
606 head and neck cancer show poor survival. *Oral oncology* 80:52-55.
- 607 47. Dongre A, Weinberg RA. 2019. New insights into the mechanisms of epithelial-mesenchymal  
608 transition and implications for cancer. *Nat Rev Mol Cell Biol* 20:69-84.
- 609 48. Nulton TJ, Olex AL, Dozmorov M, Morgan IM, Windle B. 2017. Analysis of the cancer genome  
610 atlas sequencing data reveals novel properties of the human papillomavirus 16 genome in head  
611 and neck squamous cell carcinoma. *Oncotarget* 8:17684-17699.
- 612 49. Gao J, Aksoy BA, Dogrusoz U, Dresdner G, Gross B, Sumer SO, Sun Y, Jacobsen A, Sinha R,  
613 Larsson E, Cerami E, Sander C, Schultz N. 2013. Integrative analysis of complex cancer genomics  
614 and clinical profiles using the cBioPortal. *Sci Signal* 6:pl1.
- 615 50. Cerami E, Gao J, Dogrusoz U, Gross BE, Sumer SO, Aksoy BA, Jacobsen A, Byrne CJ, Heuer ML,  
616 Larsson E, Antipin Y, Reva B, Goldberg AP, Sander C, Schultz N. 2012. The cBio cancer genomics  
617 portal: an open platform for exploring multidimensional cancer genomics data. *Cancer Discov*  
618 2:401-4.
- 619 51. Das D, Bristol ML, Smith NW, James CD, Wang X, Pichierri P, Morgan IM. 2019. Werner Helicase  
620 Control of Human Papillomavirus 16 E1-E2 DNA Replication Is Regulated by SIRT1 Deacetylation.  
621 *MBio* 10.
- 622 52. Das D, Smith N, Wang X, Morgan IM. 2017. The Deacetylase SIRT1 Regulates the Replication  
623 Properties of Human Papillomavirus 16 E1 and E2. *Journal of virology* 91:e00102-e00117.
- 624 53. Higashihori N, Lehnertz B, Sampaio A, Underhill TM, Rossi F, Richman JM. 2017.  
625 Methyltransferase G9A Regulates Osteogenesis via Twist Gene Repression. *J Dent Res* 96:1136-  
626 1144.

- 627 54. Park SY, Park JW, Chun YS. 2016. Jumonji histone demethylases as emerging therapeutic targets.  
628 Pharmacol Res 105:146-51.
- 629 55. Derynck R, Weinberg RA. 2019. EMT and Cancer: More Than Meets the Eye. Dev Cell 49:313-  
630 316.
- 631 56. McBride AA, Sakakibara N, Stepp WH, Jang MK. 2012. Hitchhiking on host chromatin: how  
632 papillomaviruses persist. Biochimica et biophysica acta 1819:820-825.
- 633 57. Wan Y, Liu H, Zhang M, Huang Z, Zhou H, Zhu Y, Tao Y, Xie N, Liu X, Hou J, Wang C. 2020.  
634 Prognostic value of epithelial-mesenchymal transition-inducing transcription factors in head and  
635 neck squamous cell carcinoma: A meta-analysis. Head Neck 42:1067-1076.
- 636 58. Gort EH, Suijkerbuijk KP, Roothaan SM, Raman V, Vooijs M, van der Wall E, van Diest PJ. 2008.  
637 Methylation of the TWIST1 promoter, TWIST1 mRNA levels, and immunohistochemical  
638 expression of TWIST1 in breast cancer. Cancer Epidemiol Biomarkers Prev 17:3325-30.
- 639 59. Asanoma K, Liu G, Yamane T, Miyanari Y, Takao T, Yagi H, Ohgami T, Ichinoe A, Sonoda K, Wake  
640 N, Kato K. 2015. Regulation of the Mechanism of TWIST1 Transcription by BHLHE40 and  
641 BHLHE41 in Cancer Cells. Mol Cell Biol 35:4096-109.
- 642 60. Tan SH, Gloss B, Bernard HU. 1992. During negative regulation of the human papillomavirus-16  
643 E6 promoter, the viral E2 protein can displace Sp1 from a proximal promoter element. Nucleic  
644 Acids Res 20:251-6.
- 645 61. Tan SH, Leong LE, Walker PA, Bernard HU. 1994. The human papillomavirus type 16 E2  
646 transcription factor binds with low cooperativity to two flanking sites and represses the E6  
647 promoter through displacement of Sp1 and TFIID. J Virol 68:6411-20.
- 648 62. Morgan EL, Wasson CW, Hanson L, Kealy D, Pentland I, McGuire V, Scarpini C, Coleman N, Arthur  
649 JSC, Parish JL, Roberts S, Macdonald A. 2018. STAT3 activation by E6 is essential for the  
650 differentiation-dependent HPV18 life cycle. PLoS Pathog 14:e1006975.
- 651 63. Kim MS, Lee HS, Kim YJ, Lee DY, Kang SG, Jin W. 2019. MEST induces Twist-1-mediated EMT  
652 through STAT3 activation in breast cancers. Cell Death Differ 26:2594-2606.
- 653 64. Mohd-Sarip A, Teeuwssen M, Bot AG, De Herdt MJ, Willems SM, Baatenburg de Jong RJ,  
654 Looijenga LHJ, Zatreanu D, Bezstarosti K, van Riet J, Oole E, van Ijcken WFJ, van de Werken HJG,  
655 Demmers JA, Fodde R, Verrijzer CP. 2017. DOC1-Dependent Recruitment of NURD Reveals  
656 Antagonism with SWI/SNF during Epithelial-Mesenchymal Transition in Oral Cancer Cells. Cell  
657 Rep 20:61-75.
- 658 65. Smith JA, White EA, Sowa ME, Powell ML, Ottinger M, Harper JW, Howley PM. 2010. Genome-  
659 wide siRNA screen identifies SMCX, EP400, and Brd4 as E2-dependent regulators of human  
660 papillomavirus oncogene expression. Proceedings of the National Academy of Sciences of the  
661 United States of America 107:3752-3757.
- 662 66. Hatterschide J, Bohidar AE, Grace M, Nulton TJ, Kim HW, Windle B, Morgan IM, Munger K, White  
663 EA. 2019. PTPN14 degradation by high-risk human papillomavirus E7 limits keratinocyte  
664 differentiation and contributes to HPV-mediated oncogenesis. Proc Natl Acad Sci U S A  
665 116:7033-7042.
- 666 67. Li S, Kendall SE, Raices R, Finlay J, Covarrubias M, Liu Z, Lowe G, Lin YH, Teh YH, Leigh V, Dhillon  
667 S, Flanagan S, Aboody KS, Glackin CA. 2012. TWIST1 associates with NF- $\kappa$ B subunit RELA via  
668 carboxyl-terminal WR domain to promote cell autonomous invasion through IL8 production.  
669 BMC Biol 10:73.
- 670 68. Prabhavathy D, Vijayalakshmi R, Kanchana MP, Karunakaran D. 2014. HPV16 E2 enhances the  
671 expression of NF- $\kappa$ B and STAT3 target genes and potentiates NF- $\kappa$ B activation by inflammatory  
672 mediators. Cell Immunol 292:70-7.

- 673 69. Zheng S, Hedl M, Abraham C. 2015. Twist1 and Twist2 Contribute to Cytokine Downregulation  
674 following Chronic NOD2 Stimulation of Human Macrophages through the Coordinated  
675 Regulation of Transcriptional Repressors and Activators. *J Immunol* 195:217-26.
- 676 70. Lourenço AR, Roukens MG, Seinstra D, Frederiks CL, Pals CE, Vervoort SJ, Margarido AS, van  
677 Rheenen J, Coffey PJ. 2020. C/EBP $\alpha$  is crucial determinant of epithelial maintenance by  
678 preventing epithelial-to-mesenchymal transition. *Nat Commun* 11:785.
- 679 71. Facompre ND, Rajagopalan P, Sahu V, Pearson AT, Montone KT, James CD, Gleber-Netto FO,  
680 Weinstein GS, Jalaly J, Lin A, Rustgi AK, Nakagawa H, Califano JA, Pickering CR, White EA, Windle  
681 BE, Morgan IM, Cohen RB, Gimotty PA, Basu D. 2020. Identifying predictors of HPV-related head  
682 and neck squamous cell carcinoma progression and survival through patient-derived models.  
683 doi:10.1002/ijc.33125.
- 684 72. Gauson EJ, Donaldson MM, Dornan ES, Wang X, Bristol M, Bodily JM, Morgan IM. 2015.  
685 Evidence supporting a role for TopBP1 and Brd4 in the initiation but not continuation of human  
686 papillomavirus 16 E1/E2-mediated DNA replication. *Journal of virology* 89:4980-4991.
- 687 73. Bristol ML, James CD, Wang X, Fontan CT, Morgan IM. 2020. Estrogen Attenuates the Growth of  
688 Human Papillomavirus-Positive Epithelial Cells. *mSphere* 5:e00049-20.
- 689 74. Cheng GZ, Zhang WZ, Sun M, Wang Q, Coppola D, Mansour M, Xu LM, Costanzo C, Cheng JQ,  
690 Wang LH. 2008. Twist is transcriptionally induced by activation of STAT3 and mediates STAT3  
691 oncogenic function. *J Biol Chem* 283:14665-73.
- 692 75. Parajuli P, Singh P, Wang Z, Li L, Eragamreddi S, Ozkan S, Ferrigno O, Prunier C, Razzaque MS, Xu  
693 K, Atfi A. 2019. TGIF1 functions as a tumor suppressor in pancreatic ductal adenocarcinoma.  
694 *Embo j* 38:e101067.
- 695 76. Nulton TJ, Kim NK, DiNardo LJ, Morgan IM, Windle B. 2018. Patients with integrated HPV16 in  
696 head and neck cancer show poor survival. *Oral oncology* 80:52-55.
- 697
